# Supplementary material
Source: MDPI journal article supplement (https://www.mdpi.com/2079-9276/10/6/64)
Supplement: s1 [file s1]

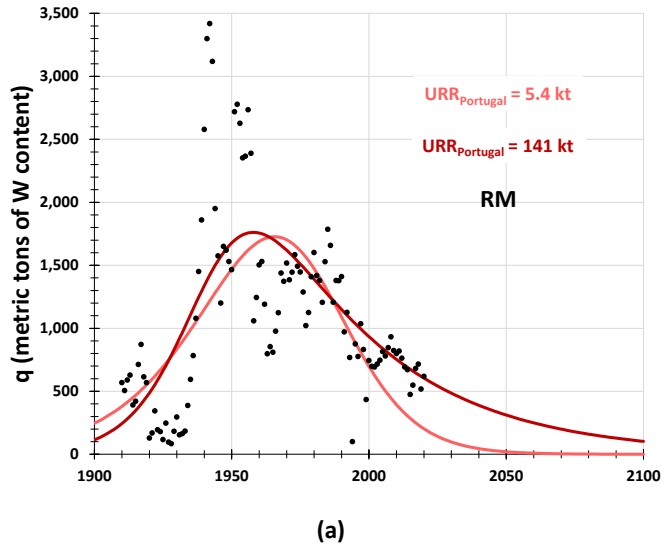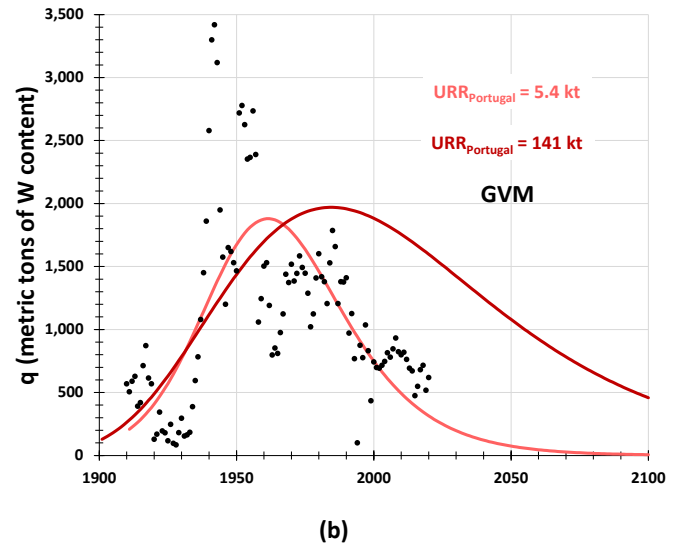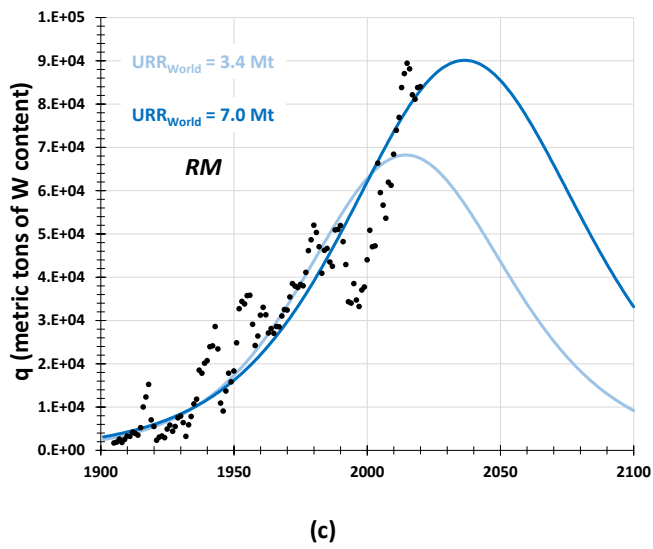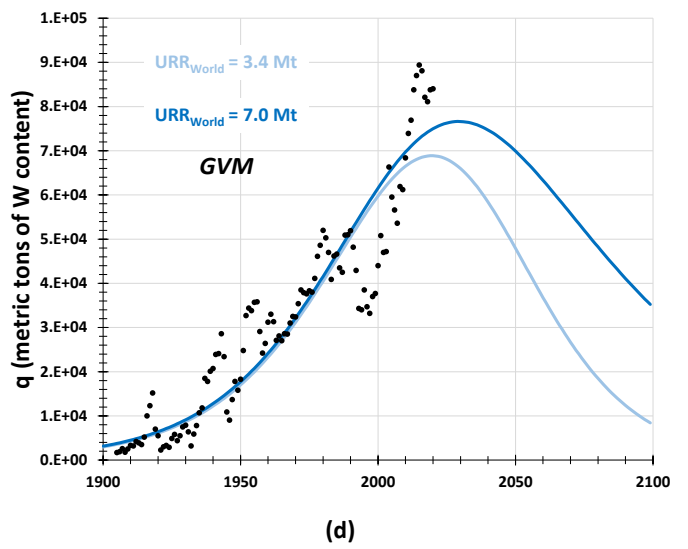

**Figure S1.** Forecasting of annual tungsten production in Portugal (a, b) and worldwide (c, d) using the RM and GVM curve-fitting constrained by historical data and maximum and minimum  $URR(t)$  values.
